# Supplementary material for: Aqueous divalent metal–nitrate interactions: hydration versus ion pairing
Source: Royal Society of Chemistry journal article supplement (doi:10.1039/b807090n), 2008-01-01
Supplement: b807090n.pdf [file b807090n.pdf]

## Supporting Information

### Aqueous divalent metal – nitrate interactions: Hydration versus ion pairing

Man Xu, James Larentzos, Mazen Roshdy, Louise J. Criscenti\*, Heather C. Allen\*

[allen@chemistry.ohio-state.edu](mailto:allen@chemistry.ohio-state.edu), [lcrisc@sandia.gov](mailto:lcrisc@sandia.gov)

**Table 1** Curve-fitting results of the nitrate in-plane deformation modes from the Raman spectra.

|                                   | 0.5 m    |       | 1 m      |       |       |      | 1.7 m    |       |       |       | 3.3 m    |       |       |       | Saturated |       |       |       |
|-----------------------------------|----------|-------|----------|-------|-------|------|----------|-------|-------|-------|----------|-------|-------|-------|-----------|-------|-------|-------|
|                                   | Position | Area  | Position |       | Area  |      | Position |       | Area  |       | Position |       | Area  |       | Position  |       | Area  |       |
|                                   |          |       | #1       | #2    | #1    | #2   | #1       | #2    | #1    | #2    | #1       | #2    | #1    | #2    | #1        | #2    | #1    | #2    |
| NH <sub>4</sub> NO <sub>3</sub> * | 718.0    | 6662  | 718.1    |       | 12623 |      | 718.2    |       | 21496 |       | 718.3    |       | 39324 |       | 718.2     |       | 88443 |       |
| Mg(NO <sub>3</sub> ) <sub>2</sub> | 719.0    | 8007  | 718.8    |       | 16535 |      | 719.9    |       | 21943 |       | 720.4    |       | 37953 |       | 720.1     |       | 48296 |       |
| Ca(NO <sub>3</sub> ) <sub>2</sub> | 719.0    | 10188 | 718.6    | 738.2 | 16241 | 3276 | 718.6    | 738.4 | 19972 | 5139  | 719.1    | 739.5 | 32589 | 10262 | 718.5     | 739.7 | 41380 | 23187 |
| Sr(NO <sub>3</sub> ) <sub>2</sub> | 720.4    | 9429  | 717.8    | 732.3 | 14850 | 3926 | 717.9    | 733.5 | 19132 | 8478  | 718.4    | 734.9 | 33914 | 19443 | 718.4     | 734.9 | 33914 | 19443 |
| Pb(NO <sub>3</sub> ) <sub>2</sub> | 721.1    | 6168  | 716.6    | 727.8 | 10327 | 6634 | 716.7    | 729.3 | 12673 | 10169 | -        | -     | -     | -     | 716.7     | 729.3 | 12673 | 10169 |

\* NH<sub>4</sub>NO<sub>3</sub> has the same nitrate concentration as other nitrate solutions. The concentrations for NH<sub>4</sub>NO<sub>3</sub> solutions are 1 m, 2 m, 3.4 m, 6.6 m, and saturated or near saturation.

**Table 2** Curve-fitting results of the nitrate symmetric stretching modes from the Raman spectra.

|                                   | 0.5m                            |                             | 1.0m                            |                             | 1.7m                            |                             | 3.3m                            |                             | Saturated                       |                             |
|-----------------------------------|---------------------------------|-----------------------------|---------------------------------|-----------------------------|---------------------------------|-----------------------------|---------------------------------|-----------------------------|---------------------------------|-----------------------------|
|                                   | Position<br>(cm <sup>-1</sup> ) | FWHM<br>(cm <sup>-1</sup> ) |
| NH <sub>4</sub> NO <sub>3</sub> * | 1047.9                          | 7.9                         | 1047.8                          | 7.9                         | 1047.8                          | 8.0                         | 1047.8                          | 8.1                         | 1047.6                          | 8.5                         |
| Mg(NO <sub>3</sub> ) <sub>2</sub> | 1048.9                          | 9.9                         | 1048.9                          | 10.3                        | 1049.9                          | 10.5                        | 1050.5                          | 11.1                        | 1050.2                          | 11.8                        |
| Ca(NO <sub>3</sub> ) <sub>2</sub> | 1048.7                          | 10.2                        | 1049.1                          | 10.6                        | 1049.9                          | 11.0                        | 1050.4                          | 11.8                        | 1050.3                          | 12.8                        |
| Sr(NO <sub>3</sub> ) <sub>2</sub> | 1049.0                          | 10.1                        | 1049.5                          | 10.7                        | 1050.5                          | 11.1                        | 1050.6                          | 12.1                        | 1050.6                          | 12.1                        |
| Pb(NO <sub>3</sub> ) <sub>2</sub> | 1046.9                          | 12.2                        | 1046.3                          | 12.8                        | 1046.1                          | 13.0                        | -                               | -                           | 1046.1                          | 13.0                        |

\* NH<sub>4</sub>NO<sub>3</sub> has the same nitrate concentration as other nitrate solutions. The concentrations for NH<sub>4</sub>NO<sub>3</sub> solutions are 1 m, 2 m, 3.4 m, 6.6 m, and saturated.

**Table 3** Curve-fitting results of the nitrate symmetric stretching modes from the infrared spectra shown in Figure 1 of this document.

|                                   | 0.5m                            | 1.0m                            | Saturated                       |
|-----------------------------------|---------------------------------|---------------------------------|---------------------------------|
|                                   | Position<br>(cm <sup>-1</sup> ) | Position<br>(cm <sup>-1</sup> ) | Position<br>(cm <sup>-1</sup> ) |
| Mg(NO <sub>3</sub> ) <sub>2</sub> | 1043.6                          | 1043.9                          | 1045.2                          |
| Ca(NO <sub>3</sub> ) <sub>2</sub> | 1042.8                          | 1043.3                          | 1044.7                          |
| Sr(NO <sub>3</sub> ) <sub>2</sub> | 1043.8                          | 1043.5                          | 1045.5                          |
| Pb(NO <sub>3</sub> ) <sub>2</sub> | 1039.2                          | 1038.6                          | 1038.4                          |

**Table 4** Curve-fitting results of the nitrate asymmetric stretching modes from the Raman spectra.

|                                   | 0.5m                            |        | Separat<br>ion | 1.0m                            |        | Separat<br>ion | 1.7m                            |        | Separat<br>ion | 3.3m                            |        | Separat<br>ion | Saturated                       |        | Separat<br>ion |
|-----------------------------------|---------------------------------|--------|----------------|---------------------------------|--------|----------------|---------------------------------|--------|----------------|---------------------------------|--------|----------------|---------------------------------|--------|----------------|
|                                   | Position<br>(cm <sup>-1</sup> ) |        |                | Position<br>(cm <sup>-1</sup> ) |        |                | Position<br>(cm <sup>-1</sup> ) |        |                | Position<br>(cm <sup>-1</sup> ) |        |                | Position<br>(cm <sup>-1</sup> ) |        |                |
|                                   | #1                              | #2     | #1             | #2                              | #1     | #2             | #1                              | #2     | #1             | #2                              | #1     | #2             |                                 |        |                |
| NH <sub>4</sub> NO <sub>3</sub> * | 1343.4                          | 1406.7 | 63.3           | 1336.5                          | 1405.6 | 69.1           | 1337.3                          | 1406.3 | 69.0           | 1333.8                          | 1403.5 | 69.7           | 1335.9                          | 1406.2 | 70.3           |
| Mg(NO <sub>3</sub> ) <sub>2</sub> | 1344.7                          | 1407.9 | 63.2           | 1344.5                          | 1410.7 | 66.2           | 1342.3                          | 1409.1 | 66.8           | 1344.3                          | 1412.0 | 67.7           | 1344.1                          | 1412.6 | 68.5           |
| Ca(NO <sub>3</sub> ) <sub>2</sub> | 1350.8                          | 1415.2 | 64.4           | 1347.4                          | 1415.1 | 67.7           | 1348.0                          | 1418.9 | 70.9           | 1349.2                          | 1426.0 | 76.8           | 1349.6                          | 1430.9 | 81.3           |
| Sr(NO <sub>3</sub> ) <sub>2</sub> | 1347.3                          | 1412.2 | 64.9           | 1350.8                          | 1415.3 | 64.5           | 1353.0                          | 1418.1 | 65.1           | 1354.4                          | 1421.5 | 67.1           | 1354.4                          | 1421.5 | 67.1           |
| Pb(NO <sub>3</sub> ) <sub>2</sub> | 1335.4                          | 1418.3 | 82.9           | 1335.8                          | 1423.3 | 87.5           | 1336.3                          | 1426.7 | 90.4           | -                               | -      | -              | 1336.3                          | 1426.7 | 90.4           |

\* NH<sub>4</sub>NO<sub>3</sub> has the same nitrate concentration as other nitrate solutions. The concentrations for NH<sub>4</sub>NO<sub>3</sub> solutions are 1 m, 2 m, 3.4 m, 6.6 m, and saturated.

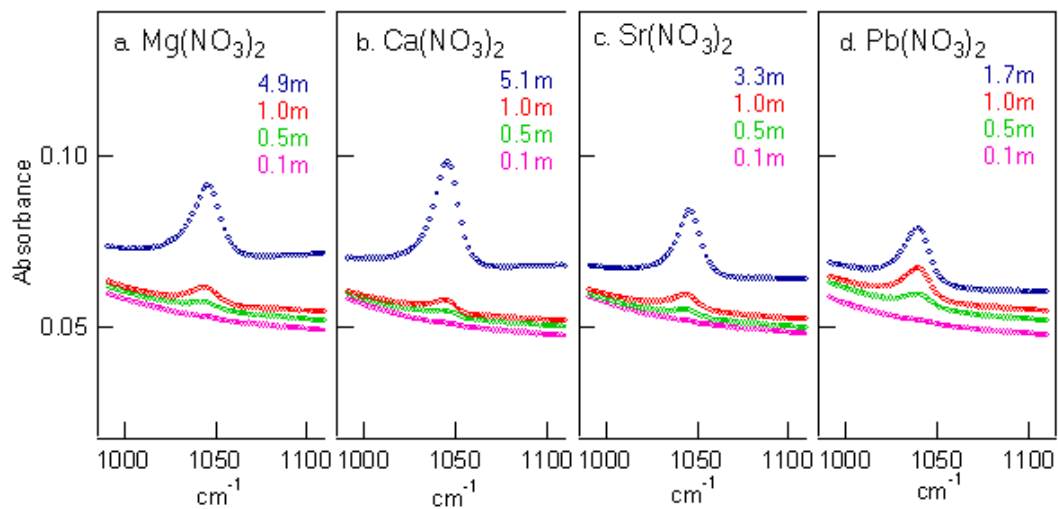

**Figure 1** Infrared spectra of nitrate symmetric stretching modes: a)  $\text{Mg}(\text{NO}_3)_2$  solutions; b)  $\text{Ca}(\text{NO}_3)_2$  solutions; c)  $\text{Sr}(\text{NO}_3)_2$  solutions; d)  $\text{Pb}(\text{NO}_3)_2$  solutions.

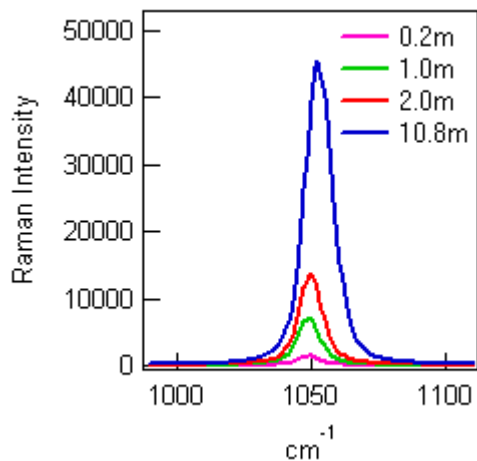

**Figure 2** Raman spectra of the nitrate symmetric stretching peak from the  $\text{NaNO}_3$  aqueous solutions at various concentrations.
